# Supplementary material
Source: PubMed Central journal article supplement (PMC3256905)
Supplement: supp_M111.294801_BBaldo_supplementary.pdf [file supp_M111.294801_BBaldo_supplementary.pdf]

## Supplementary Materials

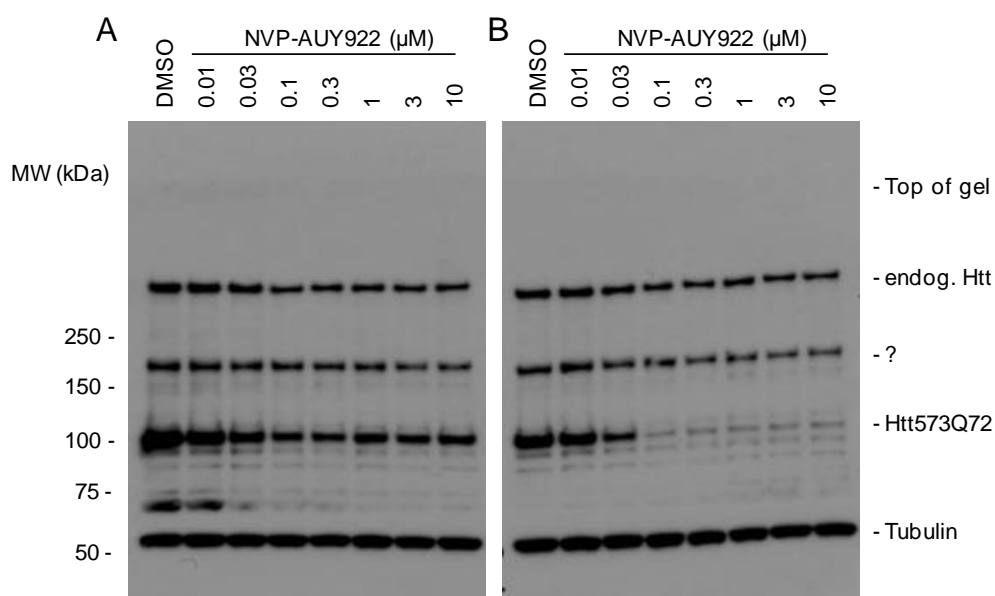

**FIGURE S1.** HN10-Htt573Q72-cell lines were cultured three days in medium containing 750 nM RSL1 to induce Htt expression. The cells were then treated with NVP-AUY922 as indicated in RSL1 containing medium (A, ‘steady state’, harvest after 24h) or in medium without RSL1 to turn off inducible Htt expression (B, ‘wash out’, harvest after 16h). Note that no aggregates are visible at top of gels. ? denotes a fragment of unknown identity (may represent a fragment of Htt). The western blot was done with Htt antibody 2B7.

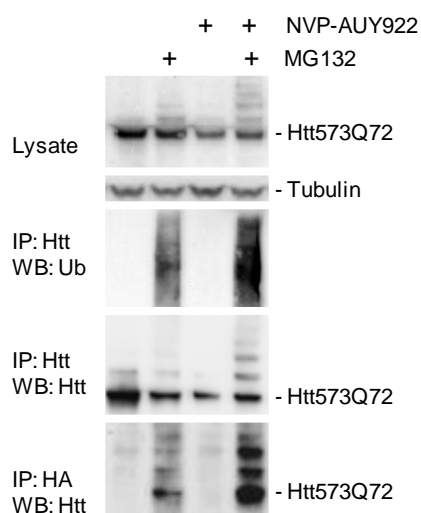

**FIGURE S2.** mHtt is ubiquitinated upon Hsp90 inhibition. HEK293T cells were transiently transfected with expression constructs for Htt573Q72 and HA-tagged ubiquitin. 24 hours later 1  $\mu$ M NVP-AUY922, 5  $\mu$ M proteasome inhibitor MG132 or a combination of the two was applied o/N. Immunoprecipitation was performed using anti-HA (Roche, 12CA5) and anti-Htt antibodies (2B7).
